# Supplementary material for: A Novel Label-Free Electrochemical Immunosensor for the Detection of Thyroid Transcription Factor 1 Using Ribbon-like Tungsten Disulfide-Reduced Graphene Oxide Nanohybrids and Gold Nanoparticles
Source: MDPI journal article supplement (doi:10.3390/molecules29020552), 2024-01-22
Supplement: s1 [file s1]

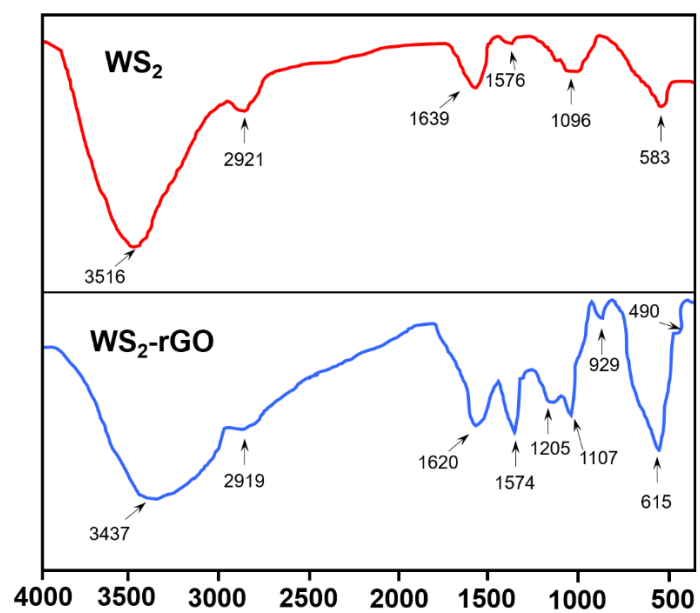

**Figure S1.** FTIR analysis of WS<sub>2</sub> and WS<sub>2</sub>-rGO.

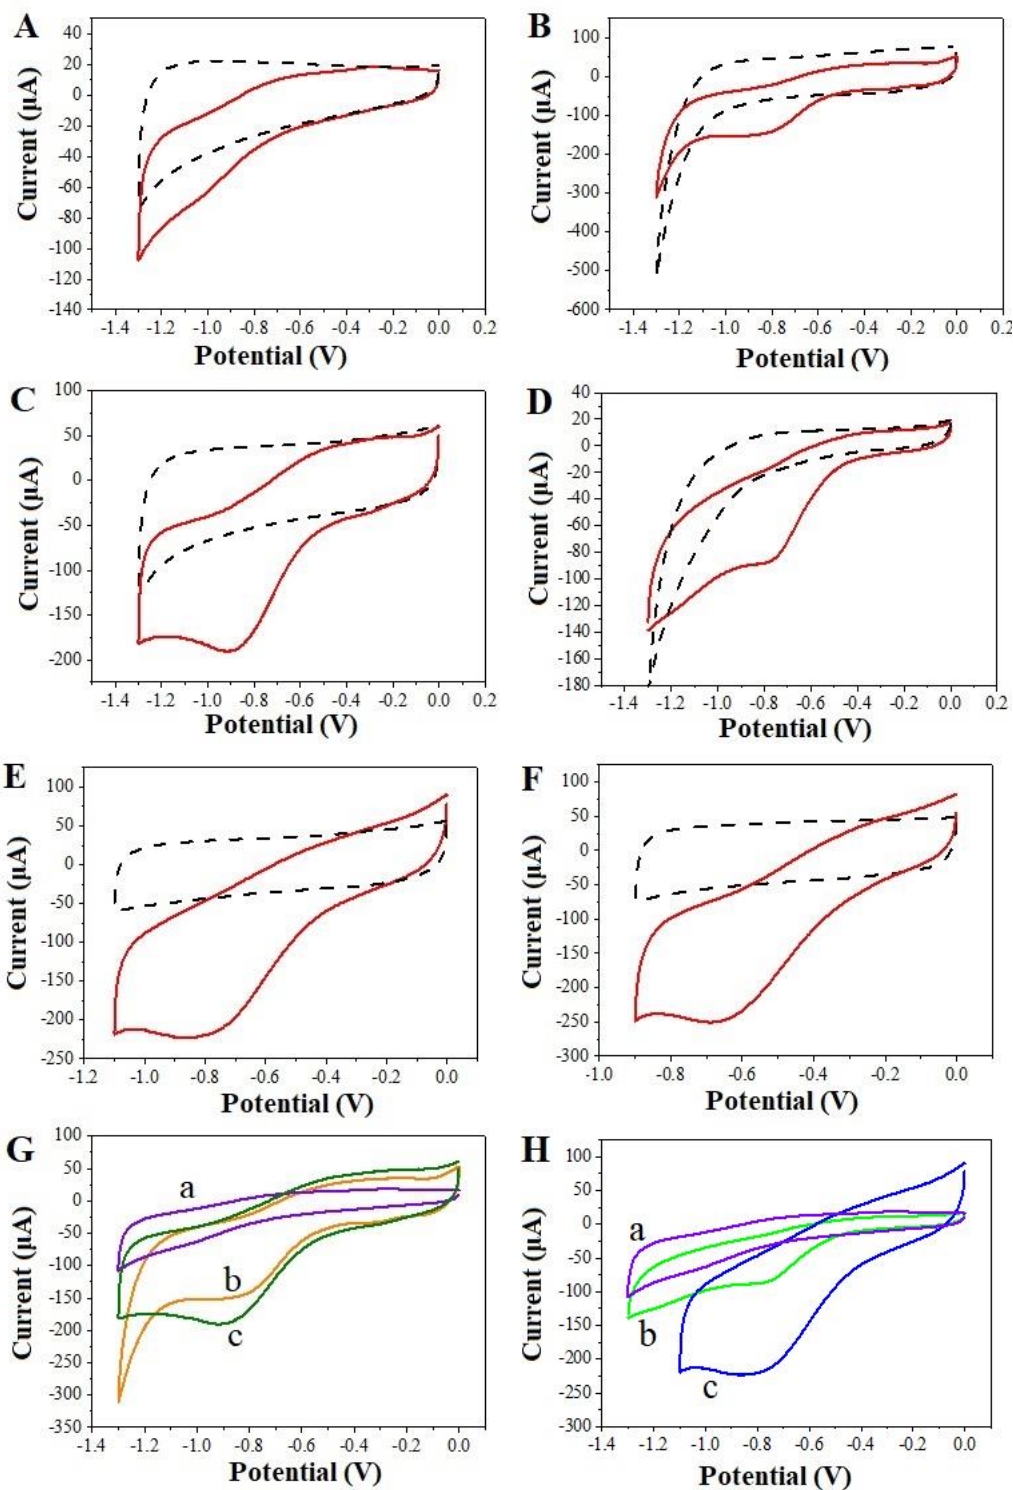

**Figure S2.** CVs of bare GCE (A), GO/GCE (B), rGO/GCE (C),  $\text{WS}_2$ /GCE (D),  $\text{WS}_2$ -rGO/GCE (E) and AuNPs/ $\text{WS}_2$ -rGO/GCE (F) in the absence (dotted lines) and in the presence (solid lines) of 5 mM  $\text{H}_2\text{O}_2$  in  $\text{N}_2$ -saturated PBS. (G) CVs of bare GCE (a), GO/GCE (b) and rGO/GCE (c) in the presence of 5 mM  $\text{H}_2\text{O}_2$  in  $\text{N}_2$ -saturated PBS. (H) CVs of bare GCE (a),  $\text{WS}_2$ /GCE (b) and  $\text{WS}_2$ -rGO/GCE (c) in the presence of 5 mM  $\text{H}_2\text{O}_2$  in  $\text{N}_2$ -saturated PBS.

Scan rate: 0.1 V s<sup>-1</sup>

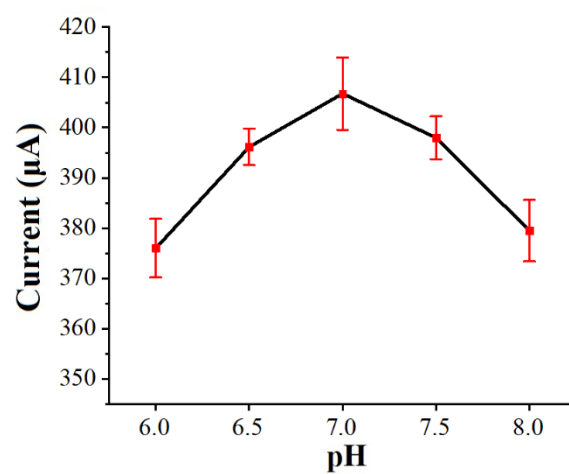

**Figure S3.** Electrocatalytic current responses of AuNPs/WS<sub>2</sub>-rGO/GCE in PBS at different pH values towards the reduction of 5 mM H<sub>2</sub>O<sub>2</sub>.

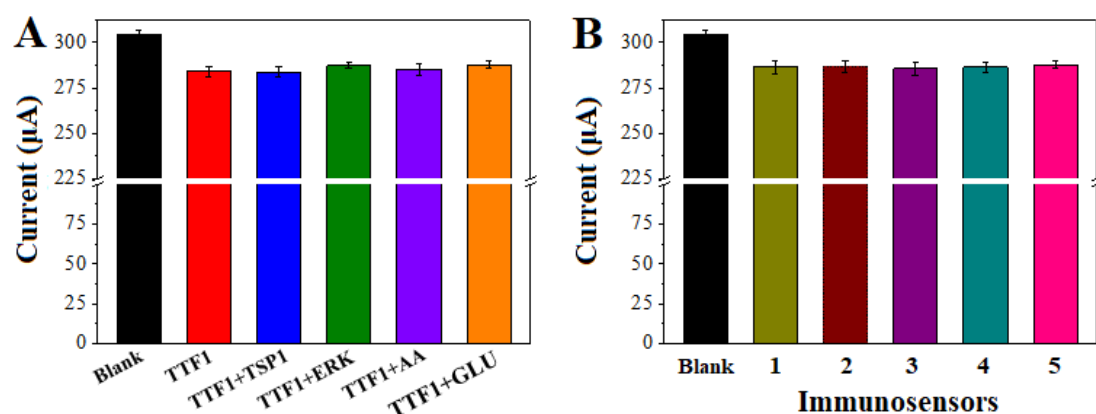

**Figure S4.** (A) Electrochemical signal responses of the immunosensor towards blank PBS, 15 ng mL<sup>-1</sup> TTF1, 15 ng mL<sup>-1</sup> TTF1 +100 ng mL<sup>-1</sup> TSP1, 15 ng mL<sup>-1</sup> TTF1 +100 ng mL<sup>-1</sup> ERK, 15 ng mL<sup>-1</sup> TTF1 + 100 ng mL<sup>-1</sup> BSA and 15 ng mL<sup>-1</sup> TTF1 +100 ng mL<sup>-1</sup> GLU.

(B) Electrochemical signal responses of the five immunosensors independently fabricated towards 15 ng mL<sup>-1</sup> TTF1. LSV responses were performed in a N<sub>2</sub>-saturated pH 7.0 PBS containing 5 mM H<sub>2</sub>O<sub>2</sub>. Error bars represent SD from three independent determinations.

**Table S1.** Determination of TTF1 in human serum sample.

|                                    | <b>Initial TTF1 in<br/>Serum Sample<br/>(ng mL<sup>-1</sup>)</b> | <b>Added<br/>TTF1<br/>(ng mL<sup>-1</sup>)</b> | <b>Measured TTF1<br/>(ng/mL)</b> | <b>Recovery<br/>(%, n = 3)</b> | <b>RSD<br/>(%, n=3)</b> |
|------------------------------------|------------------------------------------------------------------|------------------------------------------------|----------------------------------|--------------------------------|-------------------------|
| <b>The<br/>proposed<br/>method</b> | 0.76                                                             | 15.00                                          | 15.70                            | 99.5                           | 3.8                     |
|                                    |                                                                  | 20.00                                          | 20.52                            | 98.7                           | 1.3                     |
|                                    |                                                                  | 25.00                                          | 26.53                            | 103.1                          | 5.2                     |
| <b>ELISA</b>                       | 0.74                                                             |                                                |                                  |                                | 2.8                     |
|                                    |                                                                  | 15.00                                          | 15.63                            | 99.3                           | 4.3                     |
|                                    |                                                                  | 20.00                                          | 20.49                            | 98.8                           | 3.5                     |
|                                    |                                                                  | 25.00                                          | 25.64                            | 99.1                           | 3.3                     |
